# Supplementary material
Source: PubMed Central journal article supplement (PMC6512267)
Supplement: jamaophthalmol-137-507-s001.pdf [file jamaophthalmol-137-507-s001.pdf]

## Supplementary Online Content

Fieß A, Schuster AK, Nickels S, et al. Association of low birth weight with altered corneal geometry and axial length in adulthood in the German Gutenberg Health Study. *JAMA Ophthalmol*. Published online February 21, 2019. doi:10.1001/jamaophthalmol.2018.7121

**eTable 1.** Characteristics of the Study Sample (n = 12 423) and Ocular Geometric Variables of the Gutenberg Health Study by Reported and Missed Birth Weight Groups Adjusted for Sex and Age

**eTable 2.** Associations of Ocular Geometry with Birth Weight (n = 7120) Adjusted for Age, Sex, Socioeconomic Status, and Ocular Comorbidities

**eTable 3.** Associations of Ocular Morphologic Variables With Birth Weight Groups in the Gutenberg Health Study Adjusted for Sex, Age, Socioeconomic Status, and Ocular Comorbidities

This supplementary material has been provided by the authors to give readers additional information about their work.

**eTable 1. Characteristics of the Study Sample (n = 12 423) and Ocular Geometric Variables of the Gutenberg Health Study by Reported and Missed Birth Weight Groups Adjusted for Sex and Age**

Mean ± Standard Deviation or Median and 25%/75% Quantiles. g- gram; mm-millimeter; dpt – diopter; AMD - age-related macular degeneration; OD - right eye; OS – left eye

| <b>Variable</b>                            | <b>Reported BW (7183)</b> | <b>missing BW (5240)</b> | <b>P Value</b> |
|--------------------------------------------|---------------------------|--------------------------|----------------|
| Sex (Women)                                | 52.2% (3751)              | 44.2% (2314)             | <.001          |
| Age [y]                                    | 56.22±10.34               | 63.97±9.88               | <.001          |
| <b>Parameters adjusted for age and sex</b> |                           |                          |                |
| <b>Eye:</b>                                |                           |                          |                |
| Glaucom (yes)                              | 3.4% (245)                | 3.0% (157.4)             | .21            |
| AMD (yes)                                  | 1.4% (100)                | 1.6% (81.6)              | .45            |
| <b>Lenstar: (OD)</b>                       |                           |                          |                |
| Mean corneal radius [mm] (OD)              | 7.78±0.28                 | 7.75±0.26                | <.001          |
| White-to-white distance [mm] (OD)          | 12.23±0.43                | 12.18±0.43               | <.001          |
| Central corneal thickness [mm] (OD)        | 550.0±34.9                | 549.3±35.1               | .32            |
| Anterior chamber depth [mm] (OD)           | 3.28±0.36                 | 3.26±0.35                | .045           |
| Lens thickness [mm] (OD)                   | 4.31±0.36                 | 4.31±0.36                | .83            |
| Axial length [mm] (OD)                     | 23.81±1.28                | 23.67±1.22               | <.001          |
| <b>Lenstar: (OS)</b>                       |                           |                          |                |
| Mean corneal radius [mm] (OS)              | 7.77±0.28                 | 7.75±0.27                | .001           |
| White-to-white distance [mm] (OS)          | 12.24±0.43                | 12.19±0.44               | <.001          |
| Central corneal thickness [mm] (OS)        | 550.2±35.0                | 549.5±36.0               | .31            |
| Anterior chamber depth [mm] (OS)           | 3.26±0.35                 | 3.24±0.34                | .008           |
| Lens thickness [mm] (OS)                   | 4.37±0.35                 | 4.37±0.34                | .78            |
| Axial length [mm] (OS)                     | 23.77±1.29                | 23.64±1.23               | <.001          |

**eTable 2. Associations of Ocular Geometry with Birth Weight (n = 7120)  
Adjusted for Age, Sex, Socioeconomic Status, and Ocular Comorbidities**

| Birth weight (per 100 g)       | Model 1#                |         |
|--------------------------------|-------------------------|---------|
|                                | B [95% CI]              | P Value |
| Mean corneal radius (mm)       | 0.005 [0.0046; 0.006]   | <.001   |
| White to white (mm)            | 0.006 (0.005; 0.007)    | <.001   |
| Central corneal thickness (μm) | 0.339 (0.241; 0.436)    | <.001   |
| Anterior chamber depth (mm)    | -0.0001 (-0.001; 0.001) | .081    |
| Lens thickness (mm)            | -0.001 (-0.002; 0.0002) | .13     |
| Axial length (mm)              | 0.006 (0.002; 0.010)    | <.001   |

Data from the Gutenberg Health Study. Linear regression analysis using generalized estimating equations to control for correlations between right and left eyes.

# Model with adjustments for sex, age, socio-economic status (SES) and ocular comorbidities such as glaucoma and age-related macular degeneration.

**eTable 3. Associations of Ocular Morphologic Variables With Birth Weight Groups in the Gutenberg Health Study Adjusted for Sex, Age, Socioeconomic Status, and Ocular Comorbidities**

|                                       | Model 1#              |         |
|---------------------------------------|-----------------------|---------|
|                                       | B [95% CI]            | P Value |
| <b>Mean corneal radius (mm)</b>       |                       |         |
| Birth weight < 2500 g                 | -0.08 [-0.10; -0.06]  | <.001   |
| Birth weight 2500 g – 4000 g          | Reference             |         |
| Birth weight > 4000 g                 | 0.06 [0.04; 0.07]     | <.001   |
| <b>White to white (mm)</b>            |                       |         |
| Birth weight < 2500 g                 | -0.09 [-0.12; -0.06]  | <.001   |
| Birth weight 2500 g – 4000 g          | Reference             |         |
| Birth weight > 4000 g                 | 0.06 [0.04; 0.09]     | <.001   |
| <b>Central corneal thickness (µm)</b> |                       |         |
| Birth weight < 2500 g                 | -4.43 [-7.21; -1.65]  | .001    |
| Birth weight 2500 g – 4000 g          | Reference             |         |
| Birth weight > 4000 g                 | 5.11 [3.17; 7.04]     | <.001   |
| <b>Anterior chamber depth (mm)</b>    |                       |         |
| Birth weight < 2500 g                 | 0.03 [-0.001; 0.06]   | .054    |
| Birth weight 2500 g – 4000 g          | Reference             |         |
| Birth weight > 4000 g                 | -0.03 [-0.05; -0.006] | .010    |
| <b>Lens thickness (mm)</b>            |                       |         |
| Birth weight < 2500 g                 | -0.02 (-0.05; 0.01)   | .12     |
| Birth weight 2500 g – 4000 g          | Reference             |         |
| Birth weight > 4000 g                 | 0.01 (-0.01; 0.02)    | .61     |
| <b>Axial length (mm)</b>              |                       |         |
| Birth weight < 2500 g                 | -0.06 (-0.17; 0.04)   | .24     |
| Birth weight 2500 g – 4000 g          | Reference             |         |
| Birth weight > 4000 g                 | 0.02 (-0.05; 0.09)    | .56     |

Low birth weight n = 382; normal birth weight n = 5837; high birth weight n = 901. Linear regression analysis using generalized estimating equations to control for correlations between right and left eyes.

# Model with adjustments for sex, age, socio-economic status (SES) and ocular comorbidities such as glaucoma and age-related macular degeneration.
